# Supplementary material for: Schizophrenia-associated SAP97 mutations increase glutamatergic synapse strength in the dentate gyrus and impair contextual episodic memory in rats
Source: PubMed Central journal article supplement (PMC8831576; doi:10.1038/s41467-022-28430-5), 2022-02-10
Supplement: 41467_2022_28430_MOESM2_ESM.pdf [file 41467_2022_28430_MOESM2_ESM.pdf]

## Reporting Summary

Nature Research wishes to improve the reproducibility of the work that we publish. This form provides structure for consistency and transparency in reporting. For further information on Nature Research policies, see our [Editorial Policies](#) and the [Editorial Policy Checklist](#).

### Statistics

For all statistical analyses, confirm that the following items are present in the figure legend, table legend, main text, or Methods section.

n/a Confirmed

- |                                     |                                     |                                                                                                                                                                                                                                                            |
|-------------------------------------|-------------------------------------|------------------------------------------------------------------------------------------------------------------------------------------------------------------------------------------------------------------------------------------------------------|
| <input type="checkbox"/>            | <input checked="" type="checkbox"/> | The exact sample size ( $n$ ) for each experimental group/condition, given as a discrete number and unit of measurement                                                                                                                                    |
| <input type="checkbox"/>            | <input checked="" type="checkbox"/> | A statement on whether measurements were taken from distinct samples or whether the same sample was measured repeatedly                                                                                                                                    |
| <input type="checkbox"/>            | <input checked="" type="checkbox"/> | The statistical test(s) used AND whether they are one- or two-sided<br><i>Only common tests should be described solely by name; describe more complex techniques in the Methods section.</i>                                                               |
| <input checked="" type="checkbox"/> | <input type="checkbox"/>            | A description of all covariates tested                                                                                                                                                                                                                     |
| <input checked="" type="checkbox"/> | <input type="checkbox"/>            | A description of any assumptions or corrections, such as tests of normality and adjustment for multiple comparisons                                                                                                                                        |
| <input type="checkbox"/>            | <input checked="" type="checkbox"/> | A full description of the statistical parameters including central tendency (e.g. means) or other basic estimates (e.g. regression coefficient) AND variation (e.g. standard deviation) or associated estimates of uncertainty (e.g. confidence intervals) |
| <input type="checkbox"/>            | <input checked="" type="checkbox"/> | For null hypothesis testing, the test statistic (e.g. $F$ , $t$ , $r$ ) with confidence intervals, effect sizes, degrees of freedom and $P$ value noted<br><i>Give <math>P</math> values as exact values whenever suitable.</i>                            |
| <input checked="" type="checkbox"/> | <input type="checkbox"/>            | For Bayesian analysis, information on the choice of priors and Markov chain Monte Carlo settings                                                                                                                                                           |
| <input checked="" type="checkbox"/> | <input type="checkbox"/>            | For hierarchical and complex designs, identification of the appropriate level for tests and full reporting of outcomes                                                                                                                                     |
| <input type="checkbox"/>            | <input checked="" type="checkbox"/> | Estimates of effect sizes (e.g. Cohen's $d$ , Pearson's $r$ ), indicating how they were calculated                                                                                                                                                         |

*Our web collection on [statistics for biologists](#) contains articles on many of the points above.*

### Software and code

Policy information about [availability of computer code](#)

Data collection

Igor Pro v.6.37 (wavemetrics) software was used to collect electrophysiological data. Any-Maze software was used to video record animals and analyze performance on behavioral paradigms.

Data analysis

Igor (wavemetrics) software was used to analyze the electrophysiological data. KaleidaGraph software was used for statistical analysis on electrophysiological data. CM molecular modeling software (Molsoft LLC) was used to perform the structural modeling analysis. Statistica Version 7 (Statsoft) was used for statistical analysis of behavioral data. QuantStudio 5 Design & Analysis software was used to analyze RTPCR data. Imaris image analysis software (Oxford Instruments) was used to analyze SAP97 localization.

For manuscripts utilizing custom algorithms or software that are central to the research but not yet described in published literature, software must be made available to editors and reviewers. We strongly encourage code deposition in a community repository (e.g. GitHub). See the Nature Research [guidelines for submitting code & software](#) for further information.

### Data

Policy information about [availability of data](#)

All manuscripts must include a [data availability statement](#). This statement should provide the following information, where applicable:

- Accession codes, unique identifiers, or web links for publicly available datasets
- A list of figures that have associated raw data
- A description of any restrictions on data availability

All data supporting the findings of this study are provided within the paper and its supplementary information. A source data file is provided with this paper. All additional information will be made available upon reasonable request to the authors.

## Field-specific reporting

Please select the one below that is the best fit for your research. If you are not sure, read the appropriate sections before making your selection.

Life sciences  Behavioural & social sciences  Ecological, evolutionary & environmental sciences

For a reference copy of the document with all sections, see [nature.com/documents/nr-reporting-summary-flat.pdf](https://www.nature.com/documents/nr-reporting-summary-flat.pdf)

## Life sciences study design

All studies must disclose on these points even when the disclosure is negative.

|                 |                                                                                                                                                                                                                                                                                                                                                                                                                                                                                                                                                                                                                                                                                                 |
|-----------------|-------------------------------------------------------------------------------------------------------------------------------------------------------------------------------------------------------------------------------------------------------------------------------------------------------------------------------------------------------------------------------------------------------------------------------------------------------------------------------------------------------------------------------------------------------------------------------------------------------------------------------------------------------------------------------------------------|
| Sample size     | Sample sizes for electrophysiological experiments were chosen based on prior experience with the assays performed (effect trends emerging with ~4-5 neurons/group with significance achieved with 7-8 neurons/group) and in accordance with sample sizes published in the literature (e.g. Herring et al., Neuron, 2013; Watson et al., Nature Communications, 2021). Sample size for behavioral experiments was chosen based on a priori power analyses (conducted in Statistica V7) to ensure sufficient power to detect a pre-specified effect size.                                                                                                                                         |
| Data exclusions | No data was excluded from analysis.                                                                                                                                                                                                                                                                                                                                                                                                                                                                                                                                                                                                                                                             |
| Replication     | To ensure reproducibility of our electrophysiological data, paired recording data was collected from 5-10 independent pairs of cells in different slices across multiple days. Datasets achieving p-values of <0.05 were considered statistically significant. To ensure reproducibility of behavioral data, animals were divided into two cohorts of Control/Experimental animals (>= 6 animals per group) and performance of these cohorts was assessed on different days. Behavioral datasets achieving p-values of <0.05 were considered statistically significant. Conclusions were drawn from biochemical and rtPCR experiments that were replicated with independent samples >= 3 times. |
| Randomization   | Assignment of brain tissue/cells and animals to experimental and control conditions was carried out at random.                                                                                                                                                                                                                                                                                                                                                                                                                                                                                                                                                                                  |
| Blinding        | Scoring of performance on behavioral assays was performed by experimenters blind to group assignment. The fluorescence of the transfected cell in paired electrophysiological recordings precludes blinding, however the lack of experimenter control over the data obtained using this technique offers a very high level of confidence in the validity of data acquired.                                                                                                                                                                                                                                                                                                                      |

## Reporting for specific materials, systems and methods

We require information from authors about some types of materials, experimental systems and methods used in many studies. Here, indicate whether each material, system or method listed is relevant to your study. If you are not sure if a list item applies to your research, read the appropriate section before selecting a response.

### Materials & experimental systems

| n/a                                 | Involved in the study                                           |
|-------------------------------------|-----------------------------------------------------------------|
| <input type="checkbox"/>            | <input checked="" type="checkbox"/> Antibodies                  |
| <input type="checkbox"/>            | <input checked="" type="checkbox"/> Eukaryotic cell lines       |
| <input checked="" type="checkbox"/> | <input type="checkbox"/> Palaeontology and archaeology          |
| <input type="checkbox"/>            | <input checked="" type="checkbox"/> Animals and other organisms |
| <input checked="" type="checkbox"/> | <input type="checkbox"/> Human research participants            |
| <input checked="" type="checkbox"/> | <input type="checkbox"/> Clinical data                          |
| <input checked="" type="checkbox"/> | <input type="checkbox"/> Dual use research of concern           |

### Methods

| n/a                                 | Involved in the study                           |
|-------------------------------------|-------------------------------------------------|
| <input checked="" type="checkbox"/> | <input type="checkbox"/> ChIP-seq               |
| <input checked="" type="checkbox"/> | <input type="checkbox"/> Flow cytometry         |
| <input checked="" type="checkbox"/> | <input type="checkbox"/> MRI-based neuroimaging |

## Antibodies

|                 |                                                                                                                                                                                                                                                                                                                                                                                                                                                                                                                                                                                                                                                                                                                                                                                                                                                                                                                                         |
|-----------------|-----------------------------------------------------------------------------------------------------------------------------------------------------------------------------------------------------------------------------------------------------------------------------------------------------------------------------------------------------------------------------------------------------------------------------------------------------------------------------------------------------------------------------------------------------------------------------------------------------------------------------------------------------------------------------------------------------------------------------------------------------------------------------------------------------------------------------------------------------------------------------------------------------------------------------------------|
| Antibodies used | MAP2 (Sigma Aldrich Cat#4403); SAP97 (Invitrogen Cat#PA1-044 and PA1-741, Neuromab, Cat#75-030, and YenZym (custom)); IgG polyclonal isotype control antibody (Abcam Cat#171870); goat anti-rabbit Alexa Fluor 555 (Invitrogen Cat#A32732); goat anti-mouse Alexa Fluor 488 (Invitrogen Cat#A-11001); $\beta$ -actin (Cell Signaling Technology, Cat#4970S); Goat anti-rabbit, HRP-linked secondary antibody (Cell Signaling Technology, Cat#7074S); horse anti-mouse, HRP-linked secondary antibody (Cell Signaling Technology, Cat#7076S); PSD-95 (Millipore, Cat#637258); PSD-93 (Millipore, Cat#618436); SAP102 (Biolegend, Cat#832004); GFP (Neuromab, Cat#75-131, Invitrogen, Cat#A-11122); FLAG (Sigma, Cat#8592)                                                                                                                                                                                                                |
| Validation      | A SAP97 antibody (Rabbit Polyclonal) was custom made by YenZym. The manufacturer validated the specificity of the custom antibody to the immunizing peptide, chosen to ensure specificity for SAP97 and not the other MAGUKs, via ELISA. The antibody was further experimentally validated in our lab via immunolabeling in hippocampal slices, which led to an identical pattern of slice immunoreactivity with multiple SAP97 antibodies against distinct epitopes.<br><br>All other antibodies used in this study are commercially available and validated by the manufacturer. Validation data and citations can be found by searching the antibody catalog numbers provided here and in the Methods section, as well as through the direct links below. All primary antibodies used in western blot analyses were further experimentally validated by appropriate band size and absence of bands in non-transfected control cells. |

MAP2 (Sigma Aldrich Cat#M4403)

Mouse Monoclonal

Species Reactivity: Rat, Mouse, Chicken, Human, Bovine, Quail

<https://www.sigmaaldrich.com/US/en/product/sigma/m4403?context=product>

SAP97 (Invitrogen Cat#PA1-044)

Rabbit Polyclonal

Species reactivity: Human, Rat

<https://www.thermofisher.com/antibody/product/SAP97-Antibody-Polyclonal/PA1-044>

SAP97 (Invitrogen Cat# PA1-741)

Rabbit Polyclonal

Species Reactivity: Human, Mouse, Rat

<https://www.thermofisher.com/antibody/product/SAP97-Antibody-Polyclonal/PA1-741>

Neuromab, Cat#75-030, and

Mouse Monoclonal

Species Reactivity: Human, Mouse, Rat

[https://neuromab.ucdavis.edu/datasheet/K64\\_15.pdf](https://neuromab.ucdavis.edu/datasheet/K64_15.pdf)

Rabbit IgG polyclonal isotype control antibody (Abcam Cat#171870)

<https://www.abcam.com/rabbit-igg-polyclonal-isotype-control-chip-grade-ab171870.html>

$\beta$ -actin (Cell Signaling Technology, Cat#49705)

Rabbit Monoclonal

Species Reactivity: Human, Mouse, Rat, Monkey, Bovine, Pig

<https://www.cellsignal.com/products/primary-antibodies/b-actin-13e5-rabbit-mab/4970>

PSD-95 (Millipore, Cat#637258)

Rabbit polyclonal

Species Reactivity: Rat

[https://www.emdmillipore.com/US/en/product/Anti-PSD-95-Antibody,MM\\_NF-AB9708](https://www.emdmillipore.com/US/en/product/Anti-PSD-95-Antibody,MM_NF-AB9708)

PSD-93 (Millipore, Cat#618436)

Mouse Monoclonal

Species Reactivity: Mouse, Human, Rat

[https://www.emdmillipore.com/US/en/product/Anti-PSD93-Antibody-clone-N18-30,MM\\_NF-MABN497](https://www.emdmillipore.com/US/en/product/Anti-PSD93-Antibody-clone-N18-30,MM_NF-MABN497)

SAP102 (Biolegend, Cat#832004)

Mouse Monoclonal

Species Reactivity: Mouse, Human, Rat

<https://www.biolegend.com/en-us/products/hrp-anti-sap102-antibody-16668?GroupID=GROUP32>

GFP (Neuromab, Cat#75-131)

Mouse Monoclonal

[https://neuromab.ucdavis.edu/datasheet/N86\\_8.pdf](https://neuromab.ucdavis.edu/datasheet/N86_8.pdf)

GFP (Invitrogen, Cat#A-11122)

Rabbit Polyclonal

<https://www.thermofisher.com/antibody/product/GFP-Antibody-Polyclonal/A-11122>

FLAG (Sigma, Cat#8592)

Mouse Monoclonal

<https://www.sigmaaldrich.com/US/en/product/sigma/a8592>

Secondary Antibodies:

goat anti-rabbit Alexa Fluor 555 (Invitrogen Cat#A32732)

<https://www.thermofisher.com/antibody/product/Goat-anti-Rabbit-IgG-H-L-Highly-Cross-Adsorbed-Secondary-Antibody-Polyclonal/A32732>

goat anti-mouse Alexa Fluor 488 (Invitrogen Cat#A-11001)

<https://www.thermofisher.com/antibody/product/Goat-anti-Mouse-IgG-H-L-Cross-Adsorbed-Secondary-Antibody-Polyclonal/A-11001>

Anti-rabbit, HRP-linked secondary antibody (Cell Signaling Technology, Cat#7074S)

<https://www.cellsignal.com/products/secondary-antibodies/anti-rabbit-igg-hrp-linked-antibody/7074>

Anti-mouse, HRP-linked secondary antibody (Cell Signaling Technology, Cat#7076S)  
<https://www.cellsignal.com/products/secondary-antibodies/anti-mouse-igg-hrp-linked-antibody/7076>

## Eukaryotic cell lines

Policy information about [cell lines](#)

|                                                                   |                                                                                                                                                                                                                                                                                                                                                                                                                                                                                                                                                                                                            |
|-------------------------------------------------------------------|------------------------------------------------------------------------------------------------------------------------------------------------------------------------------------------------------------------------------------------------------------------------------------------------------------------------------------------------------------------------------------------------------------------------------------------------------------------------------------------------------------------------------------------------------------------------------------------------------------|
| Cell line source(s)                                               | HEK293 cells (ATCC, Cat#CRL-1573) Lot#70009859; HEK293T cells (ATCC, Cat#CRL-3216) Lot#63696280                                                                                                                                                                                                                                                                                                                                                                                                                                                                                                            |
| Authentication                                                    | HEK293 STR Profiling: Amelogenin: X; CSF1PO: 11,12; D13S317: 12,14; D16S539: 9,13; D5S818: 8,9; D7S820: 11,12; TH01: 7,9,3; TPOX: 11; vWA: 16,19<br>HEK293T STR Profiling: CSF1PO: 11,12; D13S317: 12,14; D16S539: 9,13; D5S818: 8,9; D7S820: 11; TH01: 7, 9,3; TPOX: 11; vWA: 16,19; Amelogenin: X<br><br>Authentication information is available at the distributor website: <a href="https://www.atcc.org/products/all/CRL-1573.aspx">https://www.atcc.org/products/all/CRL-1573.aspx</a> <a href="https://www.atcc.org/products/all/CRL-3216.aspx">https://www.atcc.org/products/all/CRL-3216.aspx</a> |
| Mycoplasma contamination                                          | Tests for mycoplasma contamination were performed by ATCC using the Hoechst DNA stain (indirect) method, agar culture (direct) method, and PCR-based assay. None were detected in all three tests.                                                                                                                                                                                                                                                                                                                                                                                                         |
| Commonly misidentified lines (See <a href="#">ICLAC</a> register) | No commonly misidentified cell lines were used in the study.                                                                                                                                                                                                                                                                                                                                                                                                                                                                                                                                               |

## Animals and other organisms

Policy information about [studies involving animals](#); [ARRIVE guidelines](#) recommended for reporting animal research

|                         |                                                                                                                                                                                                                                                     |
|-------------------------|-----------------------------------------------------------------------------------------------------------------------------------------------------------------------------------------------------------------------------------------------------|
| Laboratory animals      | P6-P15 male and female Sprague Dawley rats (Charles River) were used for tissue preparation for slice physiology and slice immunostaining. Male Sprague dawley rats (Envigo) weighing between 300-400g (~P90) were used for behavioral experiments. |
| Wild animals            | No wild animals were used in the study.                                                                                                                                                                                                             |
| Field-collected samples | No field collected samples were used in the study.                                                                                                                                                                                                  |
| Ethics oversight        | Experiments were performed in accordance with NIH Guidelines for the Care and Use of Laboratory Animals, and all procedures were approved by the Institutional Animal Care and Use Committee of the University of Southern California.              |

Note that full information on the approval of the study protocol must also be provided in the manuscript.
